# Supplementary material for: Evaluating a novel MR‐compatible foot pedal device for unipedal and bipedal motion: Test–retest reliability of evoked brain activity
Source: PubMed Central journal article supplement — Hum Brain Mapp. 2020 Oct 22;42(1):128–38. doi: 10.1002/hbm.25209 (PMC7721228; doi:10.1002/hbm.25209), 2020-10-22
Supplement: HBM-42-128-s002.pdf [file HBM-42-128-s002.pdf]

| Part #                                     | Part name/Description                                                                                  | Qty   |
|--------------------------------------------|--------------------------------------------------------------------------------------------------------|-------|
| <b>80/20 Inc.</b>                          |                                                                                                        |       |
| 1010-3-CL                                  | 1.00" X 1.00" T-Slotted Profile - Four Open T-Slots, 3" cut to length                                  | 4     |
| 1010-7.25-CL                               | 1.00" x 1.00" T-Slotted Profile - Four Open T-Slots, 7.25" cut to length, 1/4-20 thread tap on one end | 4     |
| 1010-15-CL                                 | 1.00" X 1.00" T-Slotted Profile - Four Open T-Slots, 15" cut to length                                 | 2     |
| 1010-17-CL                                 | 1.00" X 1.00" T-Slotted Profile - Four Open T-Slots, 17" cut to length                                 | 2     |
| 1010-29.5-CL                               | 1.00" X 1.00" T-Slotted Profile - Four Open T-Slots, 29.5" cut to length                               | 2     |
| 1030-11-CL                                 | 1.00" X 3.00" T-Slotted Profile - Eight Open T-Slots, 11" cut to length                                | 4     |
| 1515-UL-4.25-CL                            | 1.50" X 1.50" Smooth Surface T-Slotted Profile - Four Open T-Slots, 4.25" cut to length                | 2     |
| 1545-S-8-CL                                | 1.50" X .450" T-Slotted Profile - Eight Open T-Slot, 8" cut to length                                  | 2     |
| 2015-plain                                 | 10 series end cap                                                                                      | 4     |
| 2820                                       | 10 Series Economy T-Slot Cover                                                                         | 1     |
| 2828                                       | 10 Series Tread Strip                                                                                  | 7 ft. |
| 2887                                       | Aluminum handle                                                                                        | 2     |
| 3604                                       | 1/4-20 x .750" Flanged Button Head Socket Cap Screw (FBHSCS)                                           | 4     |
| 3607                                       | 5/16-18 x .687" Flanged Button Head Socket Cap Screw (FBHSCS)                                          | 8     |
| 3611                                       | 5/16-18 x .625" Button Head Socket Cap Screw (BHSCS)                                                   | 10    |
| 3627                                       | 5/16-18 x 1.250" Socket Head Cap Screw (SHCS)                                                          | 4     |
| 3632                                       | Bolt Assembly: SS 5/16-18 x 1.000" BHSCS with Washer and Slide-In Economy T-Nut - Offset Thread        | 4     |
| 3659                                       | .345" ID Washer                                                                                        | 4     |
| 3678                                       | 5/16-18 Slide-in Economy T-Nut - Offset Thread                                                         | 26    |
| 3675                                       | 1/4-20 Slide-In Economy T-Nut - Centered Thread                                                        | 154   |
| 3690                                       | 1/4-20 x .500" Button Head Socket Cap Screw (BHSCS)                                                    | 146   |
| 3692                                       | 1/4-20 x .750" Button Head Socket Cap Screw (BHSCS)                                                    | 4     |
| 4081                                       | 10 Series 5 Hole - "L" Flat Plate                                                                      | 4     |
| 4107                                       | 10 Series 2 Hole - Straight Flat Plate                                                                 | 4     |
| 4132                                       | 10 Series 2 Hole - Gusseted Inside Corner Bracket                                                      | 12    |
| 4134                                       | 10 Series 4 Hole - Wide Gusseted Inside Corner Bracket                                                 | 8     |
| 4136                                       | 10 Series 4 Hole - Tall Gusseted Inside Corner Bracket                                                 | 4     |
| 4165                                       | 10 Series 8 Hole - Rectangular Flat Plate                                                              | 4     |
| 4332                                       | 15 Series & Ready Tube 2 Hole - Gusseted Inside Corner Bracket                                         | 4     |
| 4503                                       | 10 to 15 Series 2 Hole - Transition Inside Corner Bracket                                              | 6     |
| 4521                                       | 10 to 15 Series 2 Hole - Straight Transition Flat Plate with Flush Offset                              | 4     |
| 5880                                       | 15 Series 1.5" Narrow Horizontal Stanchion Base                                                        | 2     |
| <b>Custom 3D Printed (Markforged Onyx)</b> |                                                                                                        |       |
|                                            | Lateral spacer                                                                                         | 8     |
|                                            | Heel cup                                                                                               | 2     |
|                                            | Transducer support                                                                                     | 2     |
|                                            | 6 inch pulley with square hole                                                                         | 2     |

| Part #                          | Part name/Description                                                                              | Qty    |
|---------------------------------|----------------------------------------------------------------------------------------------------|--------|
| <b>Custom Machined Aluminum</b> |                                                                                                    |        |
|                                 | Coupler                                                                                            | 2      |
|                                 | Pedal side mount                                                                                   | 2      |
| <b>M2 Inc.</b>                  |                                                                                                    |        |
| RB75-ALU-T                      | 0.75" Aluminum buckle. HIGH Release version                                                        | 2      |
| N/A                             | 0.75" Ladder Strap with Tab (14" long)                                                             | 2      |
| <b>McMaster-Carr</b>            |                                                                                                    |        |
| 3211T41                         | Mounted Pulley for Rope-for Horizontal Pulling with Bearing, for 3/8" Diameter, 1100 lbs. Capacity | 2      |
| 90715A007                       | 316 Stainless Steel Nylon-Insert Locknut, 6-32 Thread Size                                         | 4      |
| 91343A100                       | 316 Stainless Steel Serrated Flange Locknut, 1/4"-20 Thread Size                                   | 16     |
| 92185A539                       | Super-Corrosion-Resistant 316 Stainless Steel Socket Head Screw 1/4"-20 Thread Size, 5/8" Long     | 4      |
| 98164A119                       | 316 Stainless Steel Button Head Hex Drive Screw, 6-32 Thread Size, 1" Long                         | 6      |
| 98201A311                       | Exact-Grip-Length Flanged Socket Head Screw, 1/4"-20 Thread Size, 15/16" Long - 3/16 drive         | 8      |
| 98201A312                       | Exact-Grip-Length Flanged Socket Head Screw, 1/4"-20 Thread Size, 1-3/16" Long - 3/16 drive        | 8      |
| <b>Spectron Sensors</b>         |                                                                                                    |        |
| SSY0185-67                      | Ratiometric Electronic Inclinometer                                                                | 2      |
| <b>Transducer Techniques</b>    |                                                                                                    |        |
| TRS-2K                          | Flanged Reaction Torque Sensor 0-2,000 inch pounds                                                 | 2      |
| TMO-2                           | Amplifier Conditioner Module (16 Hz cut off)                                                       | 2      |
| AMX-4-30                        | 30ft Mating Cable Assembly                                                                         | 2      |
| <b>Other</b>                    |                                                                                                    |        |
|                                 | 2" Wide Hook and Loop Strap                                                                        | 3 ft.  |
|                                 | TheraBand Resistance Tubing, Silver (Super Heavy)                                                  | 50 in. |
|                                 | MicroLubrol Silicone Oil (12,500 centistokes)                                                      | 4 oz.  |
|                                 | Aluminum anti-seize                                                                                | 1      |
|                                 | 6061-T6511 Square Aluminum 0.5" x 0.5" x 3.6"                                                      | 2      |
